# Supplementary material for: Glucose monitoring in living cells with single fluorescent protein-based sensors
Source: PubMed Central journal article supplement (PMC9077360; doi:10.1039/c7ra11347a), 2018-01-10
Supplement: RA-008-C7RA11347A-s001.pdf [file RA-008-C7RA11347A-s001.pdf]

## Electronic Supplementary Information

### Glucose monitoring in living cells with single fluorescent protein-based sensors

Hanyang Hu,<sup>ac</sup> Yufeng Wei,<sup>ac</sup> Daocheng Wang,<sup>ac</sup> Ni Su,<sup>ac</sup> Xianjun Chen,<sup>ac</sup> Yuzheng Zhao,<sup>ac</sup> Guixia Liu<sup>\*c</sup> and Yi Yang<sup>\* ab</sup>

a. Synthetic Biology and Biotechnology Laboratory, State Key Laboratory of Bioreactor Engineering, Shanghai Collaborative Innovation Center for Biomanufacturing Technology, , East China University of Science and Technology, 130 Mei Long Road, Shanghai 200237, China

b. Optogenetics & Synthetic Biology Interdisciplinary Research Center, CAS Center for Excellence in Brain Science, Shanghai Institutes for Biological Sciences, Chinese Academy of Sciences, Shanghai 200031, China. E-mail: yiyang@ecust.edu.cn

c. Shanghai Key Laboratory of New Drug Design, School of Pharmacy, East China University of Science and Technology, 130 Mei Long Road, Shanghai 200237, China. E-mail: gxliu@ecust.edu.cn

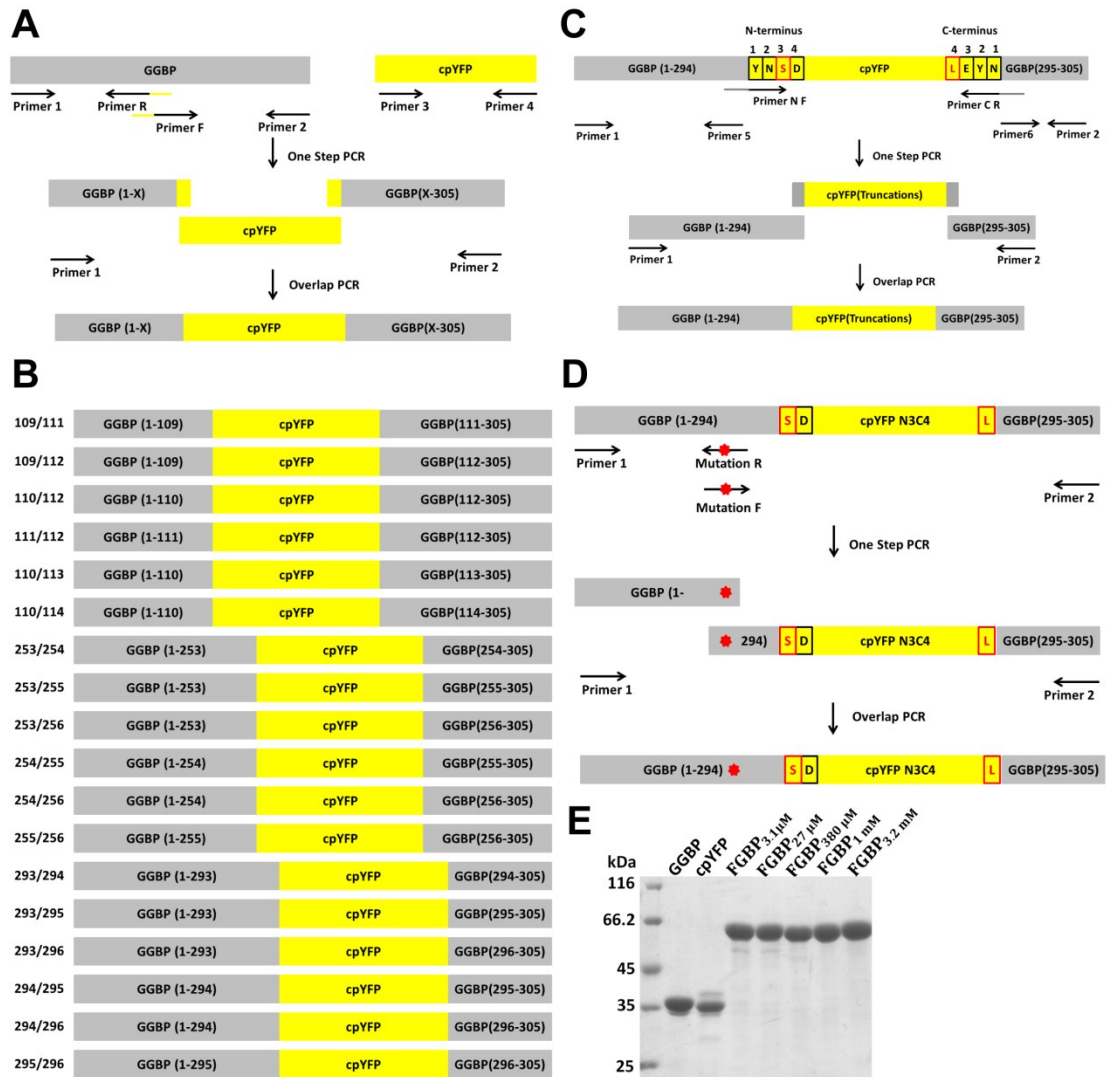

**Fig. S1 (A)** GGBP and cpYFP chimeras were obtained by overlap PCR. **(B)** Schematic model for eighteen GGBP and cpYFP chimeras. **(C)** GGBP and truncated cpYFP chimeras were obtained by overlap PCR. **(D)** FGFP<sub>27</sub>  $\mu\text{M}$  variants were obtained by overlap PCR. **(E)** Purified sensor proteins were resolved with 10% SDS-PAGE.

**Table S1 Primers Used for FGBP Construction, Truncation, and Mutation**

| Primer     | Sequence 5` to 3`                     |
|------------|---------------------------------------|
| 1          | CCCGGATCCGGCTGATACTCGCATTGGT          |
| 2          | CCCAAGCTTTTATTTCTTGCTGAATTCAGC        |
| 3          | TACAACAGCGACAACGTC                    |
| 4          | GTTGTA CTCCAGCTTG TG                  |
| 109 R      | GACGTTGTCGCTGTTGTAGCCAACGTAGTAGGCTTT  |
| 110 R      | GACGTTGTCGCTGTTGTAAGTGCCAACGTAGTAGGC  |
| 111 R      | GACGTTGTCGCTGTTGTAGTCAGTGCCAACGTAGTA  |
| 111 F      | CACAAGCTGGAGTACAACGACTCCAAAGAGTCCGGC  |
| 112 F      | CACAAGCTGGAGTACAACCTCAAAGAGTCCGGCATT  |
| 113 F      | CACAAGCTGGAGTACAACAAGAGTCCGGCATTATT   |
| 114 F      | CACAAGCTGGAGTACAACGAGTCCGGCATTATTCAA  |
| 253 R      | GACGTTGTCGCTGTTGTAGGTGCCCGCCAGTGACC   |
| 254 R      | GACGTTGTCGCTGTTGTATACGGTGCCCGCCAGTGC  |
| 255 R      | GACGTTGTCGCTGTTGTACAGTACGGTGCCCGCCAG  |
| 254 F      | CACAAGCTGGAGTACAACGTA CTGAACGATGCTAAC |
| 255 F      | CACAAGCTGGAGTACAACCTGAACGATGCTAACAAAC |
| 256 F      | CACAAGCTGGAGTACAACAACGATGCTAACAAACCA  |
| 293 R      | GACGTTGTCGCTGTTGTATACGCGGACCACTTTGTT  |
| 294 R      | GACGTTGTCGCTGTTGTAAGGTACGCGGACCACTTT  |
| 295 R      | GACGTTGTCGCTGTTGTAATAAGGTACGCGGACCAC  |
| 294 F      | CACAAGCTGGAGTACAACCTTATGTTGGCGTAGAT   |
| 295 F      | CACAAGCTGGAGTACAACCTATGTTGGCGTAGATAAA |
| 296 F      | CACAAGCTGGAGTACAACGTTGGCGTAGATAAAGAC  |
| 5          | AGGTACGCGGACCACTTT                    |
| 6          | TATGTTGGCGTAGATAAA                    |
| cpYFP N1 F | AAAGTGGTCCGCGTACCTAACAGCGACAACGTCTAT  |
| cpYFP N2 F | AAAGTGGTCCGCGTACCTAGCGACAACGTCTATATC  |
| cpYFP N3 F | AAAGTGGTCCGCGTACCTGACAACGTCTATATCATG  |
| cpYFP N4 F | AAAGTGGTCCGCGTACCTAACGTCTATATCATGGCC  |
| cpYFP C1 R | TTTATCTACGCCAACATAGTACTCCAGCTTGTGCCC  |
| cpYFP C2 R | TTTATCTACGCCAACATACTCCAGCTTGTGCCCCAG  |
| cpYFP C3 R | TTTATCTACGCCAACATACAGCTTGTGCCCCAGGAT  |
| cpYFP C4 R | TTTATCTACGCCAACATACTTGTGCCCCAGGATGTT  |
| A213R F    | CGCCAACAACGATCGTATGGCAAT              |
| A213R R    | ATTGCCATACGATCGTTGTTGGCG              |
| L238S F    | TGGCGTCGATGCGTCTCCAGAAGC              |
| L238S R    | GCTTCTGGAGACGCATCGACGCCA              |
| N256S F    | GGGCACCGTACTGTCTGATGCTAA              |
| N256S R    | TTAGCATCAGACAGTACGGTGCCC              |

## Supplementary Note

### The DNA sequence of FGBP<sub>1mM</sub>

ATGGCTGATACTCGCATTGGTGTAAACAATCTATAAGTATGATGATAACTTTATGTCTGTAGTGCGCAAGGC  
TATTGAGCAAGATGCGAAAGCCGCGCCAGATGTTTCTGCTGATGAATGATTCTCAGAATGACCAAGTCC  
AAGCAGAACGATCAGATCGACGTATTGCTGGCGAAAGGGTGAAGGCACTGGCAATCAACCTGGTTGAC  
CCGGCAGCTGCGGGTACGGTGATTGAGAAAGCGCGTGGGCAAACGTGCCGGTGGTTTTCTTCAACAAA  
GAACCGTCTCGTAAGGCGCTGGATAGCTACGACAAAGCCTACTACGTTGGCACTGACTCCAAAGAGTCCG  
GCATTATTCAAGGCGATTTGATTGCTAAACTGGGCGGCGAATCAGGGTTGGGATCTGAACAAAGACG  
GTCAGATTGAGTTCGACTGCTGAAAGGTGAACCGGGCCATCCGGATGCAGAAGCACGTACCACTTACGT  
GATTAAGAATTGAACGATAAAGGCATCAAACTGAACAGTTACAGTTAGATACCGCAATGTGGGACACC  
GCTCAGGCGAAAGATAAGATGGACGCCTGGCTGTCTGGCCCGAACGCCAACAAAATCGAAGTGGTTATC  
GCCAACAAACGATGCGATGGCAATGGGCGCGGTTGAAGCGCTGAAAGCACACAACAAGTCCAGCATTCCG  
GTGTTTGGCGTCGATGCGTCTCCAGAAGCGCTGGCGCTGGTGAATCCGGTGCCTGGCGGGCACCGTA  
CTGAACGATGCTAACAACCAGGCGAAAGCGACCTTTGATCTGGCGAAAACCTGGCCGATGGTAAAGGT  
GCGGCTGATGGCACCAACTGGAAAATCGACAACAAAGTGGTCCGCGTACCTGACAACGTCTATATCATGG  
CCGACAAGCAGAAGAACGGCATCAAGGCCTACTTCAAGATCCGCCACAACGTGAGGACGGCAGCGTGC  
AGCTCGCCGACCACTACCAGCAGAACACCCCATCGGCGACGGCCCGTGTCTGCTGCCGACAACCACTA  
CCTGAGCTTCCAGTCCGTCCTGAGCAAAGACCCCAACGAGAAGCGCGATCACATGGTCCTGCTGGAGTTC  
GTGACCGCCGCGGGATCACTCTCGGCATGGACGAGCTGTACAACGTGGATGGCGGTAGCGGTGGCACC  
GGCAGCAAGGGCGAGGAGCTGTTACCGGGGTGGTGGCCATCCTGGTTCGAGCTGGACGGCGACGTA  
CGGCCACAAGTTCAGCGTGTCCGGCGAGGGCGAGGGCGATGCCACCTACGGCAAGCTGACCCTGAAGCT  
GATCTGCACCACCGCAAGCTGCCCGTGCCTGGCCACCCTCGTGACCACCCTCGGCTACGGCCTGAAG  
TGCTTCGCCCCTACCCGACCACATGAAGCAGCAGACTTCTTCAAGTCCGCCATGCCCGAAGGCTACGT  
CCAGGAGCGCACCATCTTCTTCAAGGACGACGGCAACTACAAGACCCGCGCCGAGGTGAAGTTCGAGGG  
CGACACCCTGGTGAACCGCATCGAGCTGAAGGGCATCGGCTTCAAGGAGGACGGCAACATCCTGGGGCA  
CAAGTATGTTGGCGTAGATAAAGACAACCTGGCTGAATTCAGCAAGAAATAA

### The amino acid sequence of FGBP<sub>1mM</sub>

MADTRIGVTIYKYDDNFMSVVRKAIEQDAKAAPDVQLLMNDSQNDQSKQNDQIDVLLAKGVKALAINLVDP  
AAAGTVIEKARGQNPVFFNKEPSRKALDSYDKAYVVGTDSESGIIGDLIAKHWAANQGWDLNKDGGIQ  
FVLLKGEPGHPDAEARTTYVIKELNDKGIKTEQLQLDTAMWDTAQAKDKMDAWLSGPNANKIEVVIANND  
MAMGAVEALKAHNKSSIPVFGVDASPEALALVKSGALAGTVLNDANNQAKATFDLAKNLADGKGAADGTN  
WKIDNKVVRVDPNVYIMADKQKNGIKAYFKIRHNVEDGSVQLADHYQQNTPIGDGPVLLPDNHYLSFQSVLS  
KDPNEKRDMVLLFVTAAGITLGMDELYNVDGSGGTGSKGEELFTGVVPILVELDGDVNGHKFSVSGE  
GDATYGLTLKLICTTGKLPVPWPTLVTTLGYGLKCFARYPDHMKQHDFFKSAMPEGYVQERTIFFKDDGNYK  
TRAEVKFEGDTLVNRIELKIGIFKEDGNILGHKYVGVDKDNLAEFSK
